# Supplementary material for: The formation of heterointerface defects in Au/Cu films on Si substrates under direct current in a vacuum ultraviolet environment
Source: Royal Society of Chemistry journal article supplement (doi:10.1039/c5cp06499f), 2016-01-01

## Electronic Supplementary Information

### The formation of heterointerface defects in Au/Cu films on Si substrates under direct current in a vacuum ultraviolet environment

Kai Yan,<sup>ab</sup> Wenqing Yao,<sup>b\*</sup> Jiangli Cao,<sup>a\*</sup> Liping Yang,<sup>b</sup> Yuanyuan Zhao,<sup>a</sup> Lixia Zhao,<sup>c</sup> and Yongfa Zhu<sup>b</sup>

<sup>a</sup> Institute for Advanced Materials and Technology, University of Science and Technology Beijing, Beijing 100083, China

<sup>b</sup> Department of Chemistry, Tsinghua University, Beijing 100084, China

<sup>c</sup> Institute of Semiconductors, Chinese Academy of Science, Beijing 100083, China

**Fig. S1.** The AES depth profile of the sample in Cu films which were connected with the positive electrode: (a) as-deposited; (b) under DC (CV mode) in a vacuum UV environment for 60 minutes.

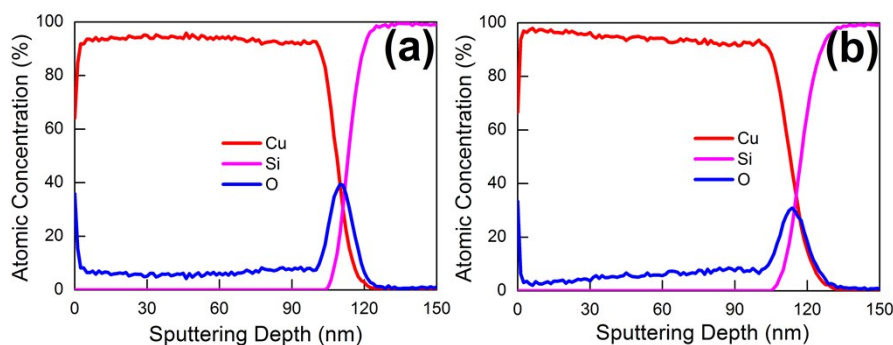

**Fig. S2.** The AES depth profile of the sample at the heterointerface in Au/Cu film deposited on Si substrate: (b) under DC in a vacuum UV environment for 60 minutes; (c) for 180 minutes.

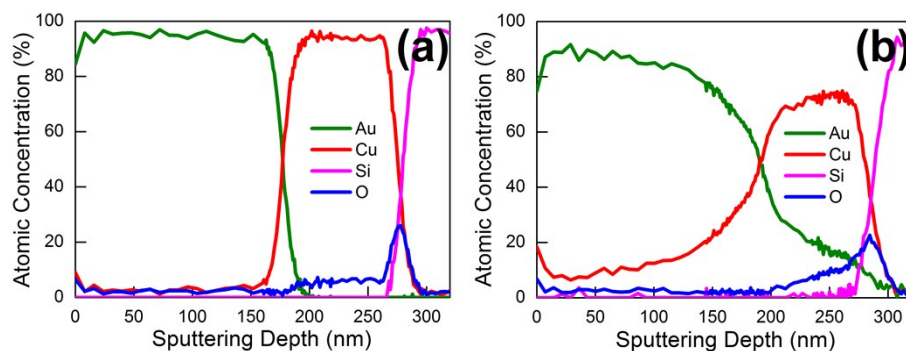

**Table S1** Crystallographic data for compounds and polymorphs of the Au-Cu system.

| Chemistry                       |        | Crystallochemical parameters |                |                                           |                                              |                                                                 |                   |
|---------------------------------|--------|------------------------------|----------------|-------------------------------------------|----------------------------------------------|-----------------------------------------------------------------|-------------------|
| Composition                     | Au :Cu | Polymorph/<br>symmetry       | Space<br>group | Atoms per<br>unit cell ( $\text{\AA}^3$ ) | No. of formula<br>weights per unit cell, $Z$ | Molar volume,<br>$V_m$ ( $10^{-6} \text{m}^3 \text{mol}^{-1}$ ) | JCPDS<br>Card No. |
| Au                              |        | Cubic                        | $Fm-3m$        | 67.85                                     | 4                                            | 10.21                                                           | 04-0784           |
| Cu                              |        | Cubic                        | $Fm-3m$        | 47.24                                     | 4                                            | 7.11                                                            | 04-0836           |
| AuCu                            | 1      | Orthorhombic                 | $Pbam$         | 114.10                                    | 4                                            | 17.18                                                           | 38-0741           |
|                                 |        | Trigonal                     | $P4/mmm$       | 57.55                                     | 2                                            | 17.33                                                           | 25-1220           |
|                                 |        | Orthorhombic                 | $Imam$         | 576.11                                    | 20                                           | 17.35                                                           | 27-0156           |
|                                 |        | Cubic                        | $Fm-3m$        | 58.05                                     | 2                                            | 17.48                                                           | 65-8608           |
| AuCu <sub>3</sub>               | 0.33   | Cubic                        | $P-43m$        | 52.65                                     | 1                                            | 31.71                                                           | 89-2049           |
|                                 |        | Cubic                        | $Pm-3m$        | 52.7                                      | 1                                            | 31.74                                                           | 35-1357           |
| Au <sub>3</sub> Cu              | 3      | Cubic                        | $Pm-3m$        | 68.30                                     | 1                                            | 41.13                                                           | 34-1302           |
| Au <sub>2</sub> Cu <sub>3</sub> | 0.67   | Orthorhombic                 | $Pmmm$         | 611.03                                    | 8.8                                          | 41.81                                                           | 27-0157           |

**Fig. S3.** THE Cu LMM Auger lines in the Au/Cu films with treatment time under DC in a vacuum UV environment: (a) 80 nm (in the Au layer); (b) 180 nm (at the Au/Cu interface); (c) 260 nm (in the Cu layer); (d) 280 nm (at the Cu/Si interface).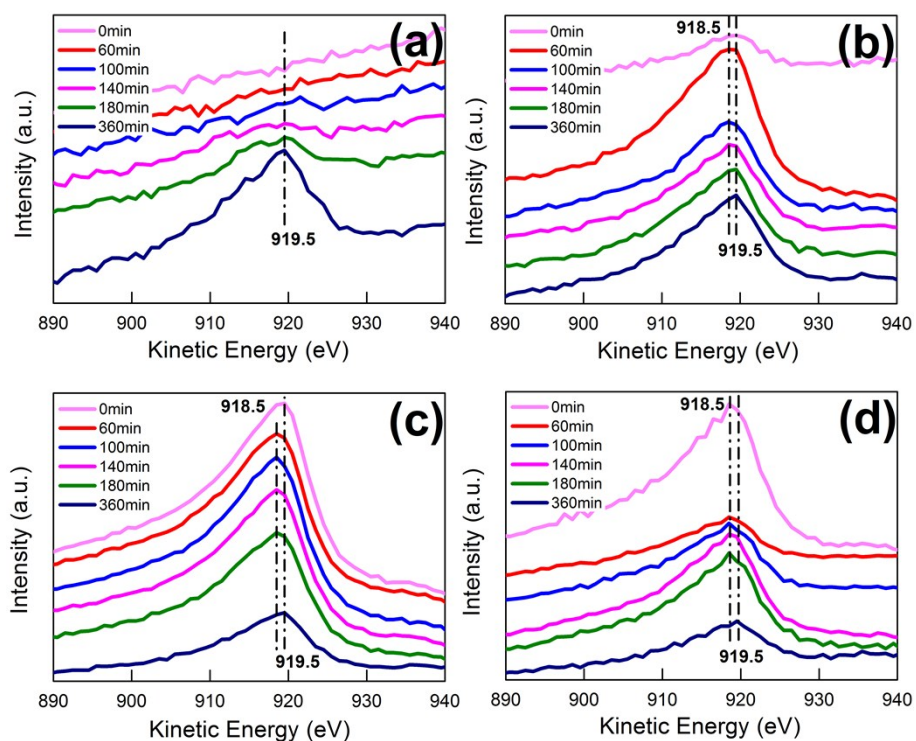

Supplement: c5cp06499f1.pdf [file c5cp06499f1.pdf]
